# Supplementary material for: Construction of non-polar mutants in Haemophilus influenzae using FLP recombinase technology
Source: Springer Nature journal article supplement (doi:10.1186/1471-2199-9-101), 2008-11-11
Supplement: Additional file 1 [file 1471-2199-9-101-s1.pdf]

## Bacterial strains and plasmids

| Strain or Plasmid                                                          | Relevant Genotype                                                                                                                                                              | Source              |
|----------------------------------------------------------------------------|--------------------------------------------------------------------------------------------------------------------------------------------------------------------------------|---------------------|
| <b><i>E. coli</i></b>                                                      |                                                                                                                                                                                |                     |
| DH5 $\alpha$                                                               | strain used for general cloning procedures                                                                                                                                     | Invitrogen          |
| DY380                                                                      | DH10B derivative containing a defective $\lambda$ prophage; <i>red</i> , <i>bet</i> and <i>gam</i> genes are controlled by the temperature-sensitive $\lambda$ cI857 repressor | [14]                |
| EC100D <i>pir</i> <sup>+</sup>                                             | host for propagation of plasmids containing the R6K $\gamma$ origin of replication                                                                                             | Epicentre           |
| <b><i>H. influenzae</i></b>                                                |                                                                                                                                                                                |                     |
| 2019                                                                       | Nontypeable <i>H. influenzae</i> strain from a patient with chronic bronchitis                                                                                                 | Michael Apicella    |
| 2019 <i>rpsL</i>                                                           | Streptomycin resistant derivative of NTHi 2019                                                                                                                                 | Michael Apicella    |
| 2019 <i>rpsL</i><br>$\Delta$ <i>pilA</i> ::spec- <i>rpsL</i> <sub>Ng</sub> | Derivative of NTHi 2019 <i>rpsL</i> with an insertion/deletion mutation in the <i>pilA</i> gene                                                                                | this study          |
| 2019 <i>rpsL</i> $\Delta$ <i>pilA</i>                                      | Derivative of NTHi 2019 <i>rpsL</i> with a non-polar mutation in the <i>pilA</i> gene                                                                                          | this study          |
| 2019 <i>pilA</i> :: $\Omega$ Km2                                           | Derivative of NTHi 2019 with a polar mutation in the <i>pilA</i> gene                                                                                                          | this study          |
| <b>Plasmids</b>                                                            |                                                                                                                                                                                |                     |
| pUC19                                                                      | cloning vector, source of the ColE1 origin                                                                                                                                     | New England Biolabs |
| pGEM-T Easy                                                                | cloning vector                                                                                                                                                                 | Promega             |
| pWSK30                                                                     | low copy number cloning vector                                                                                                                                                 | [21]                |
| pLS88                                                                      | <i>Haemophilus ducreyi</i> plasmid; useful as a shuttle vector                                                                                                                 | [23]                |
| pSpecR                                                                     | source of the spectinomycin resistance gene                                                                                                                                    | [20]                |
| pUC18K                                                                     | source of the non-polar kanamycin resistance cassette                                                                                                                          | [9]                 |
| pUC $\Delta$ Ecat                                                          | source of the chloramphenicol                                                                                                                                                  | [25]                |
| pJRS102.0                                                                  | source of the $\Omega$ Km2 cassette                                                                                                                                            | [26]                |
| pKD13                                                                      | template plasmid used for mutant construction in <i>E. coli</i> ; contains R6K $\gamma$ origin of replication                                                                  | [13]                |

|          |                                                                                                                                                                                         |            |
|----------|-----------------------------------------------------------------------------------------------------------------------------------------------------------------------------------------|------------|
| pFT-A    | source of the FLP recombinase gene under control of the <i>tet</i> regulatory system                                                                                                    | [24]       |
| pPIL1    | shuttle vector containing the <i>pilABCD</i> gene cluster from NTHi strain 86-028NP                                                                                                     | [4]        |
| pRSM2790 | spectinomycin resistance gene from pSpecR cloned into pWSK30                                                                                                                            | this study |
| pRSM2830 | normal allele of the <i>Neisseria gonorrhoeae rpsL</i> gene in pRSM2790                                                                                                                 | this study |
| pRSM2832 | pKD13 derivative used as a template plasmid for mutant construction in NTHi                                                                                                             | this study |
| pRSM2848 | derivative of pPIL1 lacking the <i>pilB</i> , <i>pilC</i> and <i>pilD</i> genes                                                                                                         | this study |
| pRSM2855 | <i>pil</i> gene cluster from NTHi 2019 cloned into pGEM-T Easy                                                                                                                          | this study |
| pRSM2857 | <i>pilA</i> ::spec insertion/deletion mutation of pRSM2855                                                                                                                              | this study |
| pRSM2865 | plasmid containing the origin of replication and kanamycin-resistance gene from pLS88. The origin of replication contains a point mutation conferring a temperature-sensitive phenotype | this study |
| pRSM2866 | derivative of pRSM2865 containing the ColE1 origin from pUC19                                                                                                                           | this study |
| pRSM2921 | <i>cya</i> gene and flanking DNA cloned into pGEM-T Easy                                                                                                                                | this study |
| pRSM2947 | derivative of pRSM2866 containing the FLP recombinase gene from pFT-A (Figure 3)                                                                                                        | this study |
| pRSM2948 | derivative of pRSM2921 containing an insertion/deletion mutation of <i>cya</i>                                                                                                          | this study |
| pRSM3004 | derivative of pRSM2921 containing the chloramphenicol cassette in the <i>cya</i> gene                                                                                                   | this study |

---
